# Supplementary material for: Unmarried Cohabitation and Union Stability: The Cohabitation-diffusion-hypothesis Revisited
Source: Research Square preprint supplement (doi:10.21203/rs.3.rs-8213630/v1), 2025-12-22
Supplement: Supplementary file 1 [file 96315119974430348c3c867a.docx]

**UNMARRIED COHABITATION AND UNION STABILITY: THE COHABITATION-DIFFUSION-HYPOTHESIS REVISITED**

**Supplementary Material**

|  | Coefficient | P>|z| |
| --- | --- | --- |
|  |  |  |
| cohabiting | 1.016*** | 0.000 |
| married with prior cohabitation | 0.244 | 0.220 |
| percentage cohabiting | 0.016*** | 0.000 |
| cohabiting##percentage cohabiting (*100) | -0.055 | 0.735 |
| married with prior cohabitation##percentage cohabiting (*100) | -0.365* | 0.025 |
| percentage cohabiting^2 (*100) | -0.016** | 0.001 |
| cohabiting##percentage cohabiting^2 (*100) | 0.018*** | 0.000 |
| married with prior cohabitation##percentage cohabiting^2 (*100) | 0.005 | 0.248 |
| age | -0.028*** | 0.000 |
| medium education | -0.028* | 0.014 |
| low education | -0.169*** | 0.000 |
| born elsewhere | -0.028 | 0.094 |
| age at union formation | -0.089*** | 0.000 |
| age at union formation^2 | 0.002*** | 0.000 |
| parental divorce | 0.304*** | 0.000 |
| having a child | -0.152*** | 0.000 |
| intercept | -4.976*** | 0.000 |
|  |  |  |
| N | 34997298 | |
| N countries | 21 | |
| N birth cohorts | 252 | |
| Log likelihood | -293296 | |
| random slope type of union, country | 0.399 | |
| random slope type of union, birth cohort | 0.134 | |
| covariance type of union slope on country and cohort level | 0.111 | |

*Table S1. Logit coefficients of union dissolution of cohabitors and former cohabitors compared with women who marry without prior cohabitation, by the incidence of unmarried cohabitation in the context. 21 countries, 252 birth cohorts.*
